# Supplementary material
Source: Research Square preprint supplement (doi:10.21203/rs.3.rs-8225100/v1)
Supplement: Supplementary file 1 [file 609cdd76c56868fca4986446.docx]

**APPENDIX 1**

Food items found in the stomach contents of 22 specimens of lined seedeaters (*Sporophila lineola*). For each sample, when available, the specimen’s accession number in the collection, followed by the sex, locality, and collection date, are provided. The zoological collections are as follows: MCNA (Museu de Ciências Naturais – Pontifícia Universidade Católica de Minas Gerais, Belo Horizonte), UFV-CAF (Universidade Federal de Viçosa – Campus Florestal), and MZUSP (Museu de Zoologia – Universidade de São Paulo, São Paulo). The food category (*sensu*, Lopes et al. 2016) to which each food item belongs precedes its enumeration and is abbreviated as follows: GR (granivore) and IN (insectivore). Data from stomach content analysis retrieved from the literature are marked with one asterisk for Schubart et al. (1965) and two asterisks for Poulin et al. (1994). All 11 specimens analyzed in this study and half of the specimens analyzed by Schubart et al. (1965) contained sand grains in their stomach contents.

**Breeding Grounds:**

- **MCNA 1974 (♂, UFV Campus, Florestal, MG, Brazil – Jan 16, 2011**): GR 100% = Poaceae (5 seeds – 2.0x1.0 mm plus crushed seeds).
- **MCNA 1977 (♂, UFV Campus, Florestal, MG, Brazil – Mar 19, 2012):** GR 100% = Poaceae (9 seeds – 3.0x2.0 mm plus crushed seeds).
- **MCNA 1985 (♂, UFV Campus, Florestal, MG, Brazil – Mar 19, 2012):** GR 100% = Poaceae (8 seeds – 3.0x1.0 mm plus crushed seeds).
- **Collector No.: Lopes 1252 (♀, UFV Campus, Florestal, MG, Brazil – Mar 15, 2018):** GR 95% = Poaceae (10 seeds – 4.0x1.5 mm plus crushed seeds); IN 5% = ARA (Araneae: 1) [specimen not preserved].
- **UFV-CAF 332 (♂, UFV Campus, Florestal, MG, Brazil – Apr 12, 2018):** GR 100% = Poaceae (crushed seeds).
- **UFV-CAF 384 (♂, UFV Campus, Florestal, MG, Brazil – Nov 30, 2023**): GR 100% = Poaceae (4 seeds – 3.0x1.0 mm, 5 seeds – 2.0x1.0 mm plus crushed seeds).
- **UFV-CAF 385 (♀, UFV Campus, Florestal, MG, Brazil – Jan 14, 2023):** GR 75% = unidentified seeds (crushed seeds); IN 25% = ARA (Araneae: 1).

**Wintering Grounds:**

- **UFV-CAF 352 (♀, Marchantaria Island, Iranduba, AM, Brazil – Aug 13, 2024):** GR 100% = Poaceae (~50 seeds – 1.0x0.5 mm plus crushed seeds).
- **UFV-CAF 353 (♀, Marchantaria Island, Iranduba, AM, Brazil – Aug 13, 2024):** GR 100% = Poaceae (crushed seeds).
- **UFV-CAF 364 (♂, Marchantaria Island, Iranduba, AM, Brazil – Aug 14, 2024):** GR 100% = Poaceae (~100 seeds – 1.0x0.5 mm plus crushed seeds).
- **UFV-CAF 366 (♀, Igarapé Capitari, Careiro da Várzea, AM, Brazil – Aug 15, 2024):** GR 100% = Poaceae (~70 seeds – 1.0x0.5 mm plus crushed seeds).
- **MZUSP 38603 (♂, Serra do Cachimbo, MT, Brazil – Oct 27, 1955)*:** GR 100% = Poaceae (seeds not counted).
- **MZUSP 38604 (♂, Serra do Cachimbo, MT, Brazil – Oct 27, 1955)*:** GR 100% = unidentified seeds.
- **MZUSP 38605 (♂, Serra do Cachimbo, MT, Brazil – Oct 27, 1955)*:** GR 100% = unidentified seeds.
- **MZUSP 38606 (♂, Serra do Cachimbo, MT, Brazil – Oct 27, 1955)*:** GR 100% = Poaceae (seeds not counted).
- **MZUSP 38608 (♂, Serra do Cachimbo, MT, Brazil – Oct 27, 1955)*:** GR 100% = Poaceae (seeds not counted).
- **Not collected (Araya Peninsula, Sucre, Venezuela – 1980’s)**:** GR 100% = unidentified seeds.
- **Not collected (Araya Peninsula, Sucre, Venezuela – 1980’s)**:** GR 100% = unidentified seeds.
- **Not collected (Araya Peninsula, Sucre, Venezuela – 1980’s)**:** GR 100% = unidentified seeds.
- **Not collected (Araya Peninsula, Sucre, Venezuela – 1980’s)**:** GR 100% = unidentified seeds.
- **Not collected (Araya Peninsula, Sucre, Venezuela – 1980’s)**:** GR 100% = unidentified seeds.
- **Not collected (Araya Peninsula, Sucre, Venezuela – 1980’s)**:** GR 100% = unidentified seeds.
